# Supplementary material for: Spectral reconstruction of surface adsorbed species using band-target entropy minimization. Application to CO and NO reaction over a Pt/γ-Al2O3 catalyst using in situ DRIFT spectroscopy
Source: Royal Society of Chemistry journal article supplement (doi:10.1039/b714544f), 2008-01-01
Supplement: b714544f.pdf [file b714544f.pdf]

Spectral reconstruction of surface adsorbed species using band-target  
entropy minimization (BTEM). Application to CO and NO reaction  
over a Pt/ $\gamma$ -Al<sub>2</sub>O<sub>3</sub> catalyst using *in situ* DRIFT Spectroscopy

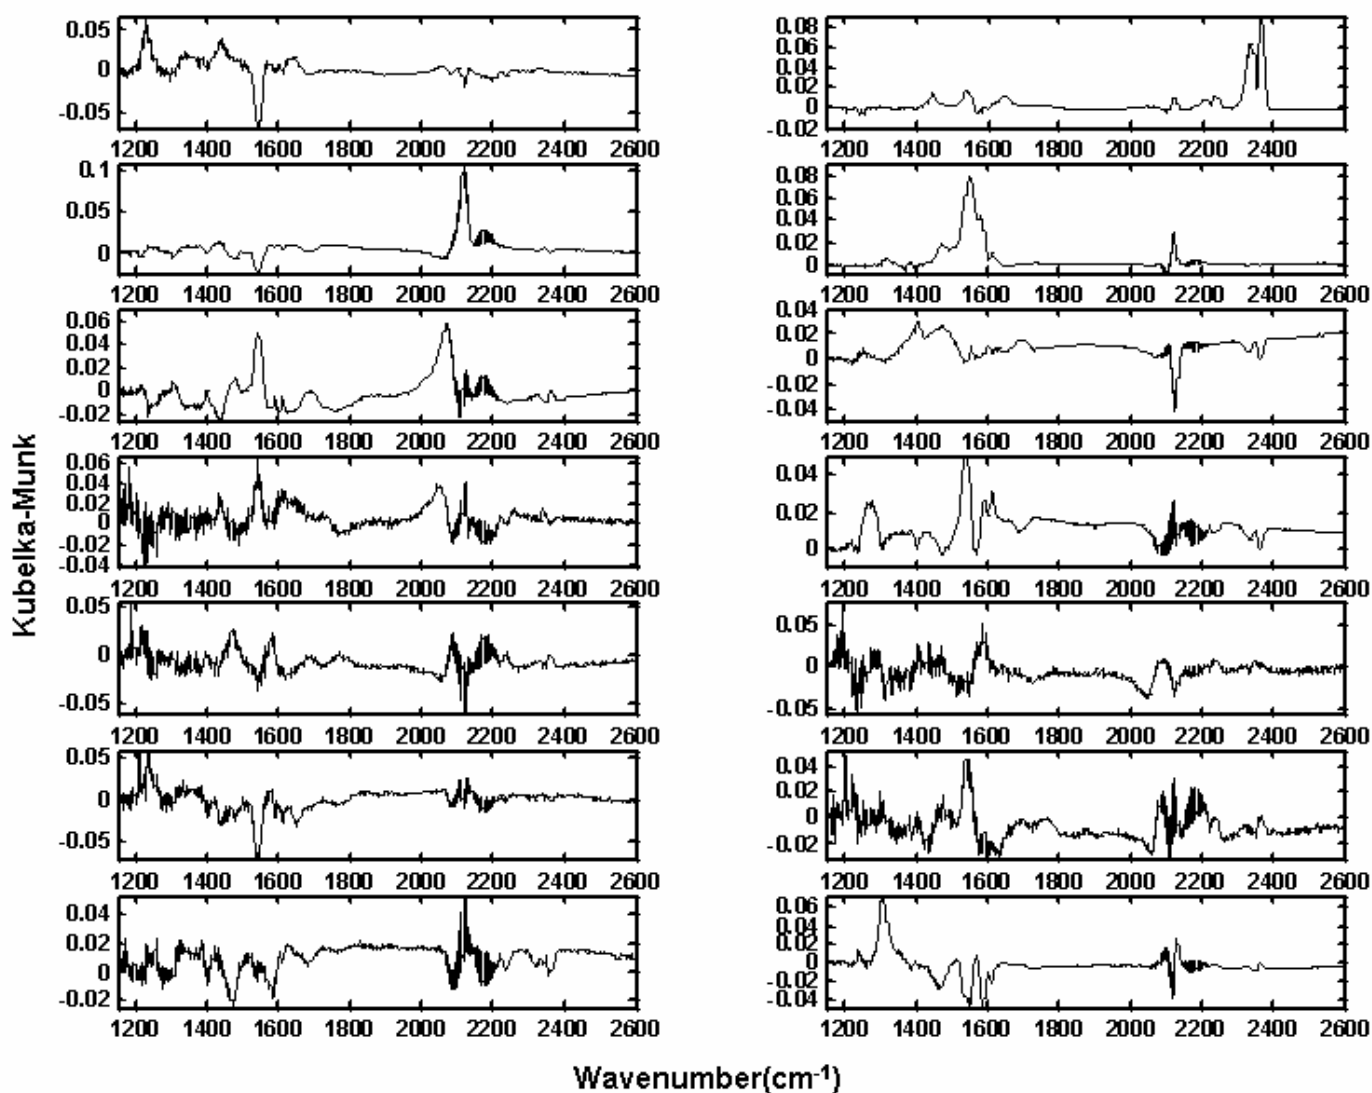

Fig. S.1. Pure component spectral reconstruction in the range 1150-4000 cm<sup>-1</sup> via SIMPLISMA

*Supplimentary Information*

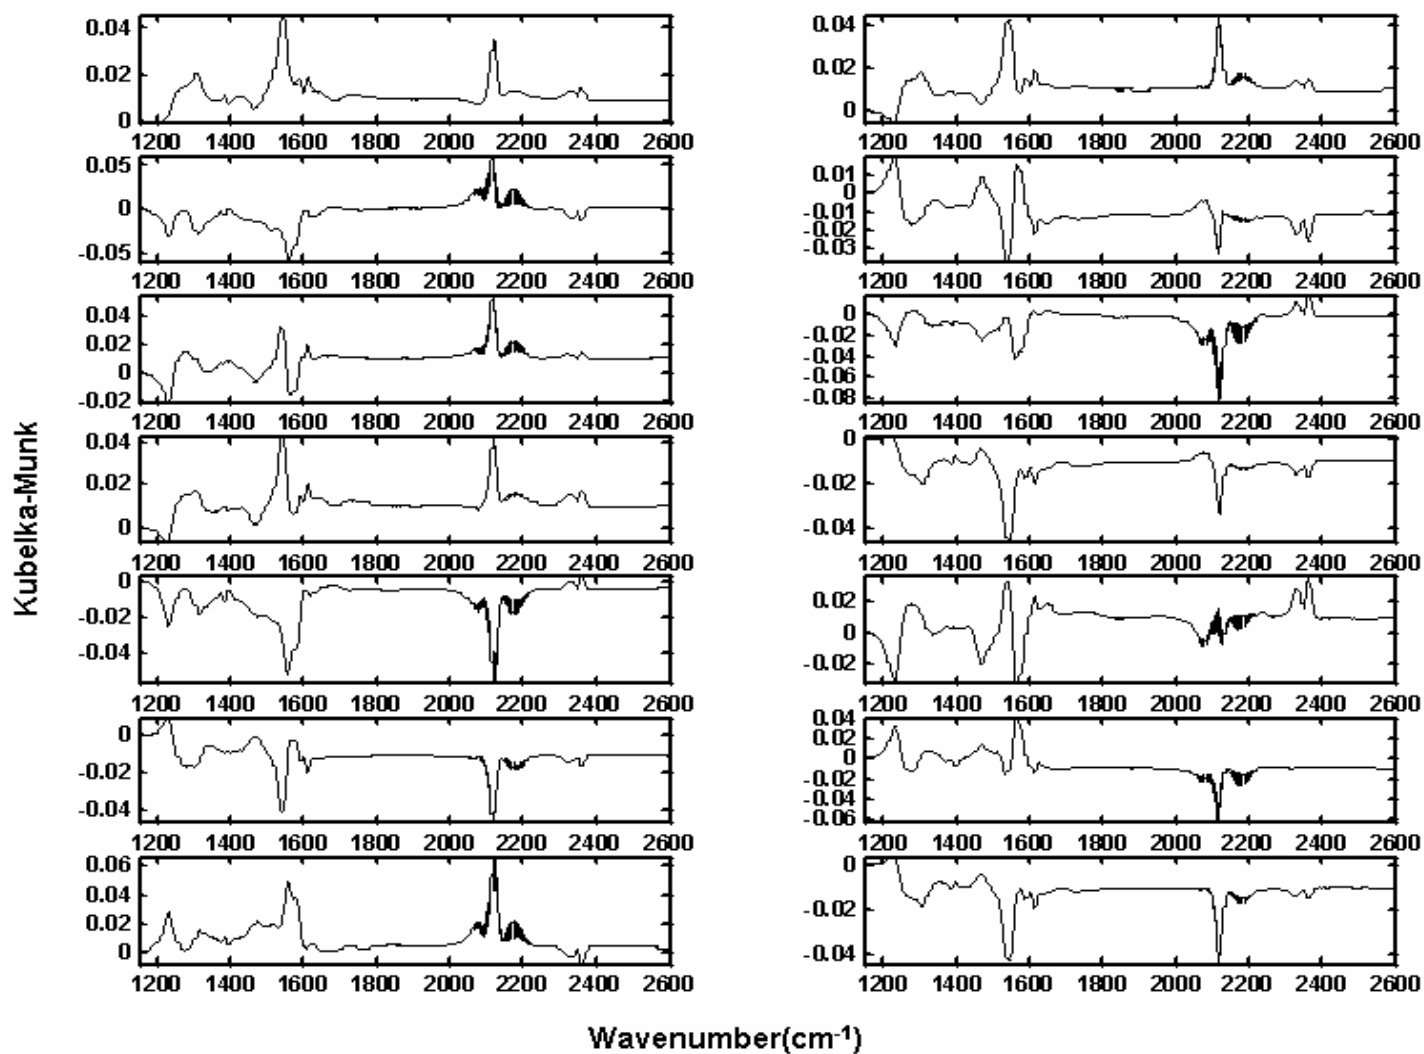

Fig. S.2. Pure component spectral reconstruction in the range 1150-4000 cm<sup>-1</sup> via IPCA
